# Supplementary material for: Enhancement of drug delivery through fibroblast activation protein–targeted near-infrared photoimmunotherapy
Source: JCI Insight. 2025 Dec 22;10(24):e195776. doi: 10.1172/jci.insight.195776 (PMC12890525; doi:10.1172/jci.insight.195776)
Supplement: Supplemental data [file jciinsight-10-195776-s109.pdf]

Supplemental Information for

**Enhancement of drug delivery through fibroblast activation protein-targeted  
near-infrared photoimmunotherapy**

Seitaro Nishimura<sup>1</sup>, Kazuhiro Noma<sup>1\*</sup>, Tasuku Matsumoto<sup>1</sup>, Yasushige Takeda<sup>1</sup>, Tatsuya  
Takahashi<sup>1</sup>, Hijiri Matsumoto<sup>1</sup>, Kento Kawasaki<sup>1</sup>, Hotaka Kawai<sup>2</sup>, Tomoyoshi Kunitomo<sup>1</sup>,  
Masaaki Akai<sup>1</sup>, Teruki Kobayashi<sup>1</sup>, Noriyuki Nishiwaki<sup>1</sup>, Hajime Kashima<sup>1</sup>, Takuya Kato<sup>1</sup>,  
Satoru Kikuchi<sup>1</sup>, Shunsuke Tanabe<sup>1</sup>, Toshiaki Ohara<sup>13</sup>, Hiroshi Tazawa<sup>14</sup>, Yasuhiro Shirakawa<sup>15</sup>,  
Peter L Choyke<sup>6</sup>, Hisataka Kobayashi<sup>6</sup>, and Toshiyoshi Fujiwara<sup>1</sup>

<sup>1</sup> Department of Gastroenterological Surgery, Okayama University Graduate School of  
Medicine, Dentistry, and Pharmaceutical Science, Okayama, Japan.

<sup>2</sup> Department of Oral Pathology and Medicine, Okayama University Graduate School of  
Medicine, Dentistry, and Pharmaceutical Science, Okayama, Japan.

<sup>3</sup> Department of Pathology and Experimental Medicine, Okayama University Graduate School of  
Medicine, Dentistry, and Pharmaceutical Science, Okayama, Japan.

<sup>4</sup> Center for Innovative Clinical Medicine, Okayama University Hospital, Okayama, Japan.

<sup>5</sup> Department of Gastroenterological Surgery, Hiroshima City Hiroshima Citizens Hospital,  
Hiroshima, Japan.

<sup>6</sup> Molecular Imaging Branch, Center for Cancer Research, National Cancer Institute, National  
Institutes of Health, Bethesda, MD, USA.

**Correspondence:** Dr. Kazuhiro Noma, Department of Gastroenterological Surgery, Okayama University Graduate School of Medicine, Dentistry, and Pharmaceutical Sciences, 2-5-1 Shikata-cho, Kita-ku, Okayama 700-8558, Japan. Phone: +81-86-235-7255; Fax: +81-86-221-8775; E-mail: [knoma@md.okayama-u.ac.jp](mailto:knoma@md.okayama-u.ac.jp).

## **List of Supplemental Information**

**Supplemental Figure 1:** Patient enrollment and analysis workflow for esophageal cancer

**Supplemental Figure 2:** Relationship between ECM components, FAP,  $\alpha$ SMA, and vascular morphology in esophageal Cancer

**Supplemental Figure 3:** In vitro evaluation of Col I, HA, and FAP expression in CAFs and NFs

**Supplemental Figure 4:** Analysis of ECM, EGFR expression, and drug penetration in CAF-poor and CAF-rich spheroid models

**Supplemental Figure 5:** Validation of Sib-IR700 and NIR-PIT-induced cytotoxicity in WI38 (control) and WI38 (TE8) cells

**Supplemental Figure 6:** Evaluation of FAP-targeted NIR-PIT effects on CAF-rich spheroids: Cell viability,  $\alpha$ SMA reduction, and Col I reduction

**Supplemental Figure 7:** Impact of FAP-targeted NIR-PIT on drug delivery and fluorescent intensity in CAF-rich tumor models

**Supplemental Figure 8:** Evaluation of FAP-targeted NIR-PIT effects on Sib-IR700 and Abra-IR800 distribution in CAF-rich tumor models

**Supplemental Figure 9:** Differential effects of Abraxane on tumor growth in CAF-poor and CAF-rich tumor models

**Supplemental Figure 10:** Tumor growth, weight, and body weight analysis in IgG-IR700 and Sib-IR700-treated mouse models with or without NIR light

**Supplemental Video Legends (Video 1-4)**

**Supplemental Table 1:** Clinicopathological features for collagen I in esophageal cancer patients

**Supplemental Table 2:** Clinicopathological features for hyaluronic acid and 0–9  $\mu\text{m}$  vessel in esophageal cancer patients

**A**

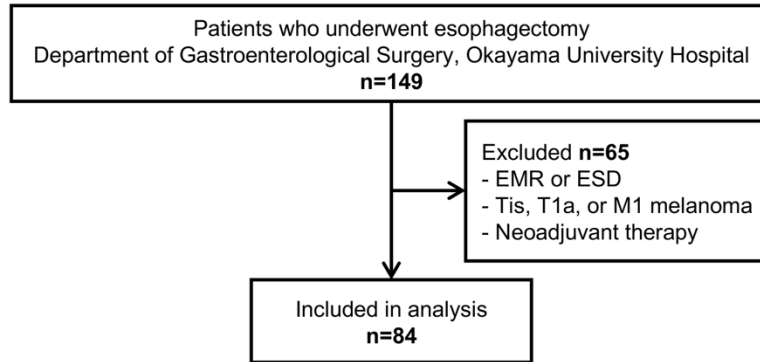

**Supplemental Figure 1. Patient enrollment and analysis workflow for esophageal cancer**

**A.** Patient enrollment flowchart

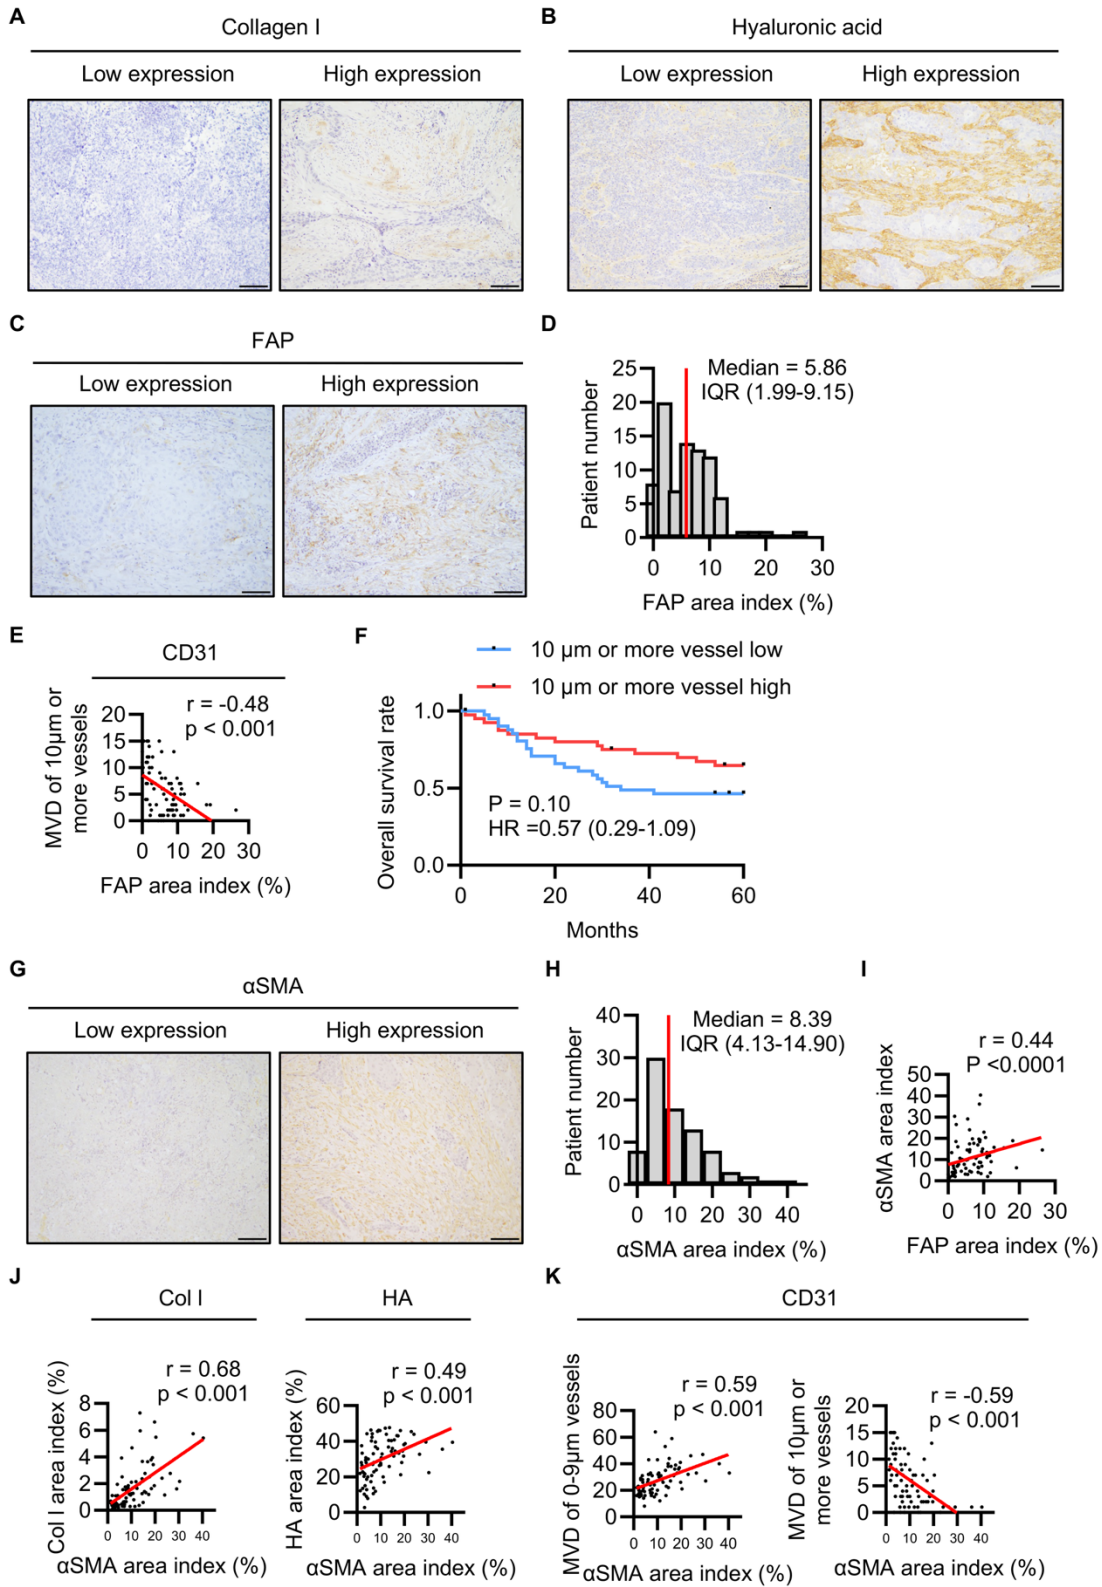

**Supplemental Figure 2. Relationship between ECM components, FAP,  $\alpha$ SMA, and vascular morphology in esophageal cancer**

**A.** Representative esophageal cancer sample showing Col I staining (200 $\times$  magnification, scale bar: 100  $\mu$ m). **B.** Representative esophageal cancer sample showing HA staining (200 $\times$  magnification, scale bar: 100  $\mu$ m). **C.** Representative esophageal cancer sample showing FAP staining (200 $\times$  magnification, scale bar: 100  $\mu$ m). **D.** Histogram showing FAP area indices, with the median marked (red bar). **E.** Correlation between FAP levels and MVD of vessels  $\geq 10$   $\mu$ m in diameter in esophageal cancer samples (n = 84, Spearman's correlation). **F.** Survival comparison for patients with high (n = 45) and low (n = 39) MVD of 10  $\mu$ m or more diameter vessels (log-rank test). **G.** Representative esophageal cancer sample showing  $\alpha$ SMA staining (200 $\times$  magnification, scale bar: 100  $\mu$ m). **H.** Histogram showing  $\alpha$ SMA area indices, with the median marked (red bar). **I.** Correlation between FAP and  $\alpha$ SMA area indices in esophageal cancer samples (n = 84, Spearman's correlation). **J.** Correlation between  $\alpha$ SMA levels and Col I/HA area indices in esophageal cancer samples (n = 84, Spearman's correlation). **K.** Correlation between  $\alpha$ SMA levels and MVD of 0–9  $\mu$ m diameter vessels and 10  $\mu$ m or more diameter vessels in esophageal cancer samples (n = 84, Spearman's correlation).

**A**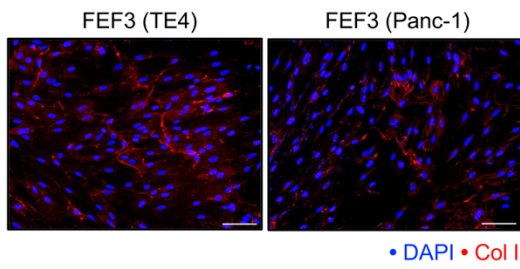**B**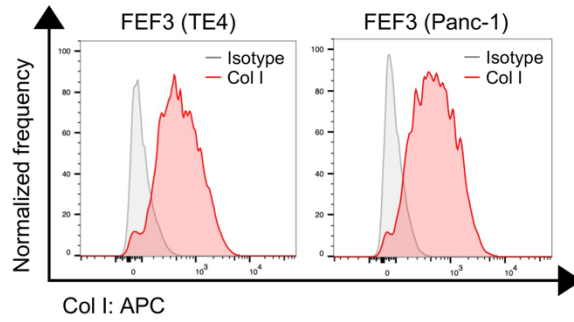**C**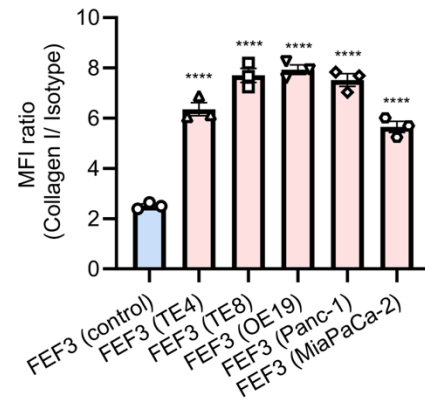**D**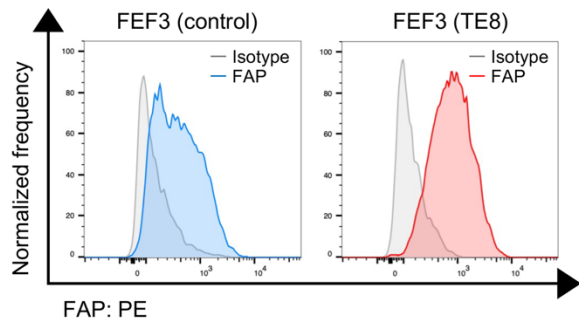**E**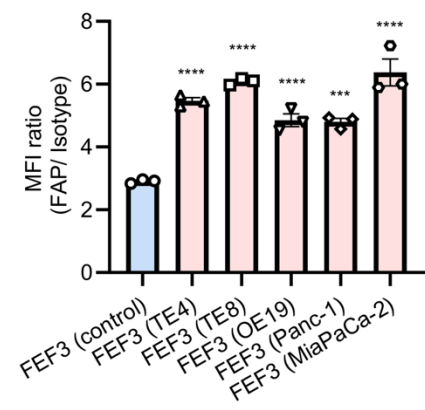**F**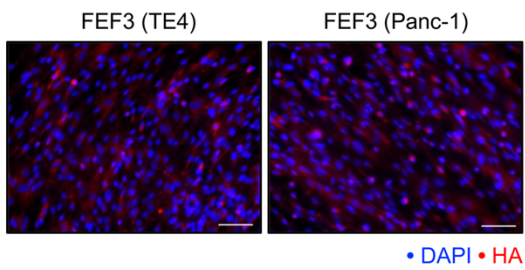

**Supplemental Figure 3. In vitro evaluation of Col I, HA, and FAP expression in CAFs and NFs**

**A.** ICC images comparing Col I expression in FEF3 (TE4 and Panc-1), Col I (red) and DAPI (blue), at 200× magnification (scale bar: 100 μm). **B.** Histogram showing Col I expression levels in FEF3 (control) and FEF3 (TE4 and Panc-1). **C.** Comparative analysis of Col I expression between FEF3 (control) and FEF3 (TE4, TE8, OE19, Panc-1 and MiaPaCa-2) in FCM (n = 3 per group; mean ± SEM; one-way ANOVA with Tukey's test). **D.** Histogram showing FAP expression levels in FEF3 (control) and FEF3 (TE8). **E.** Comparative analysis of FAP expression between FEF3 (control) and FEF3 (TE4, TE8, OE19, Panc-1 and MiaPaCa-2) in FCM (n = 3 per group; mean ± SEM; one-way ANOVA with Tukey's test). **F.** ICC images comparing HA expression in FEF3 (TE4 and Panc-1), Col I (red) and DAPI (blue), at 200× magnification (scale bar: 100 μm). Significance indicated as \*, P < .05; \*\*, P < .01; \*\*\*, P < .001; \*\*\*\*, P < .0001; N.S. (not significant).

**A**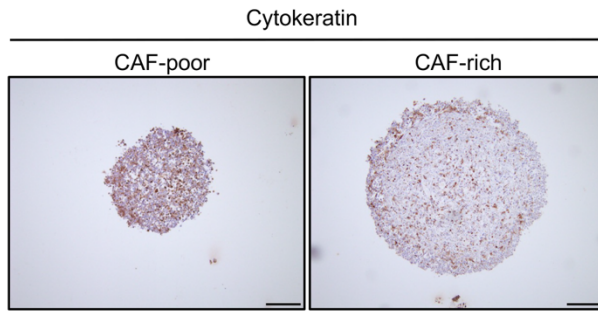**B**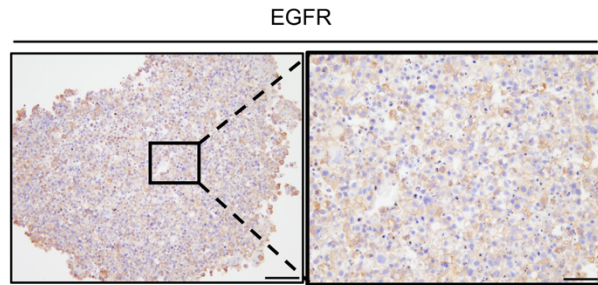**C**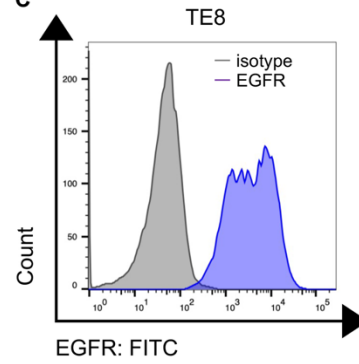**D**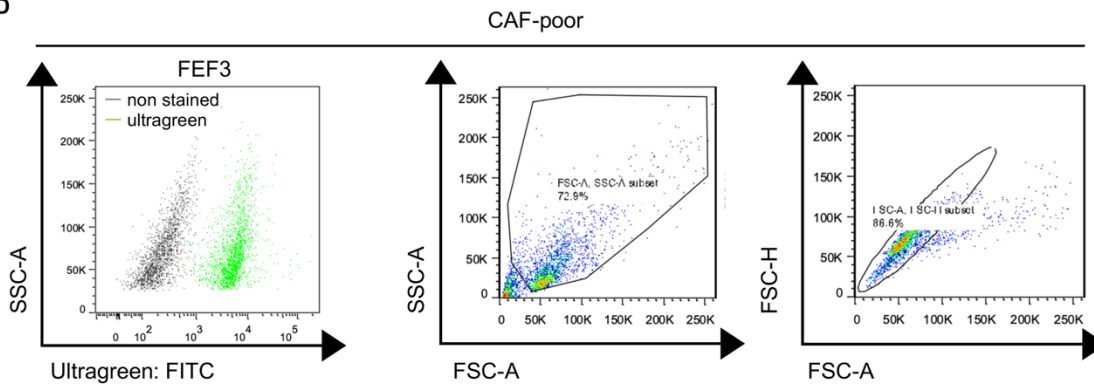**E**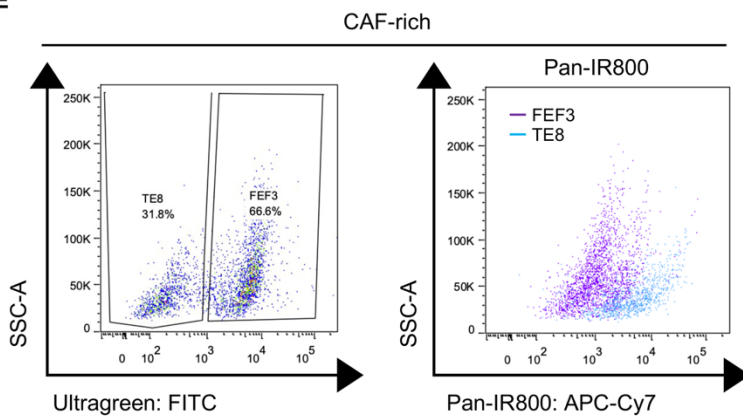

**Supplemental Figure 4. Analysis of ECM, EGFR expression, and drug penetration in CAF-poor and CAF-rich spheroid models**

CAF-poor spheroids (human TE8 cells only) and CAF-rich spheroids (human TE8 cells co-cultured with human FEF3 cells at a 1:1 ratio) were used throughout this figure.

**A.** IHC staining for cytokeratin in CAF-poor and CAF-rich spheroids at 100× magnification (scale bar: 200 μm). **B.** IHC staining for EGFR in CAF-poor spheroids at 200× magnification (right, scale bar: 100 μm) and 400× magnification (left, scale bar: 50 μm). **C.** Histogram of EGFR binding in TE8 cells. **D.** Flow cytometry of CAF-poor spheroids: Left: Ultragreen fluorescence intensity in FEF3 cells, distinguishing between non-stained (black) and ultragreen-stained populations (green). Middle: FSC-A and SSC-A gating, identifying 72.9% of the gated population as live cells. Right: FSC-A and FSC-H gating identifying 86.9% of the gated population for doublet discrimination. **E.** Flow cytometry analysis of CAF-rich spheroids. Left: Ultragreen fluorescence intensity compared to TE8 cells (unstained) and FEF3 cells (stained with ultragreen). Right: Pan-IR800 fluorescence intensity in FEF3 (blue) and TE8 (purple) cells.

**A**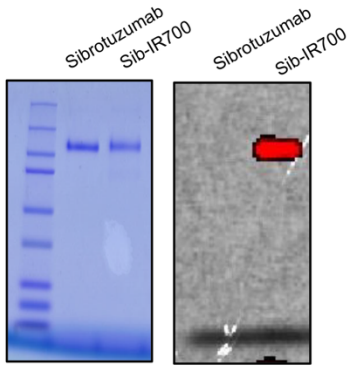**B**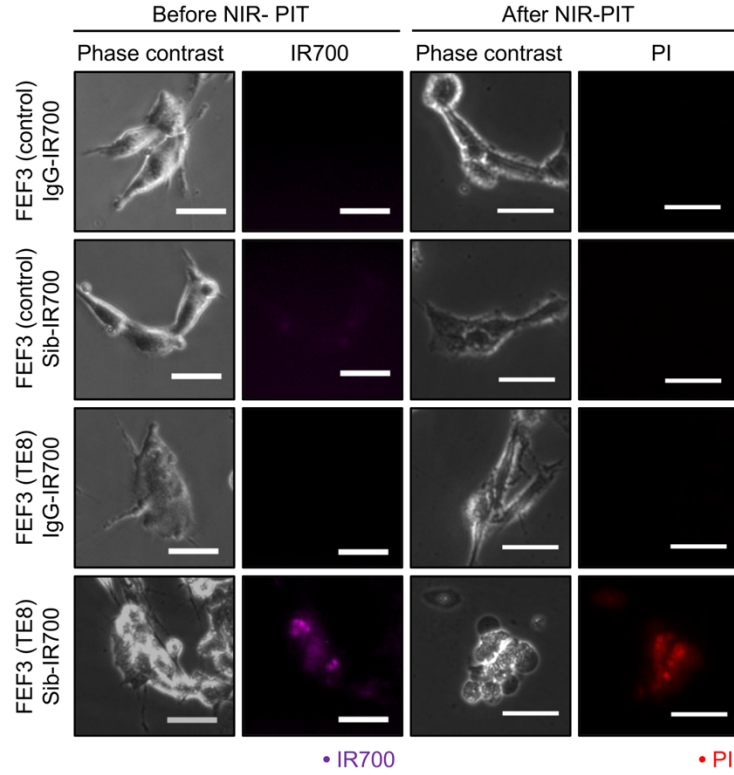**C**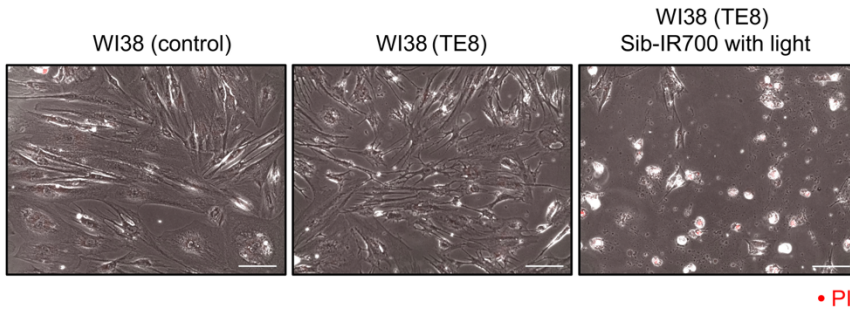**D**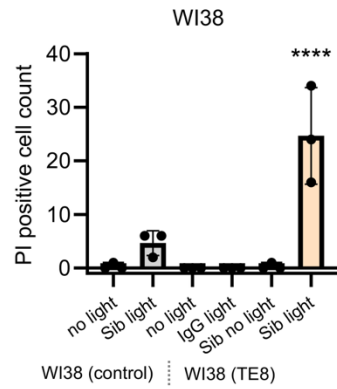

**Supplemental Figure 5. Validation of Sib-IR700 and NIR-PIT-induced cytotoxicity in WI38 (control) and WI38 (TE8) cells**

**A.** Validation of Sib-IR700 by SDS-PAGE. **Left:** Colloidal Blue staining. **Right:** IVIS spectrum with excitation filter 675 and emission filter 720. **B.** Representative ICC before and after NIR-PIT in FEF3 (control) and FEF3 (TE8) treated with IgG-IR700 or Sib-IR700, showing IR700 (magenta) and PI (red) (scale bar: 50  $\mu$ m). **C.** Fluorescent images merged with phase contrast showing PI staining in WI38 (control) and WI38 (TE8) cells, untreated or treated with Sib-IR700 and NIR light; PI (red), at 200 $\times$  magnification (scale bar: 100  $\mu$ m). **D.** Comparative analysis of PI-positive cell counts across groups: untreated, IgG-IR700, or Sib-IR700, with or without NIR light (n = 3 per group; mean  $\pm$  SEM; one-way ANOVA with Tukey's test). Statistical significance: \*, P < .05; \*\*, P < .01; \*\*\*, P < .001; \*\*\*\*, P < .0001; N.S. = not significant.

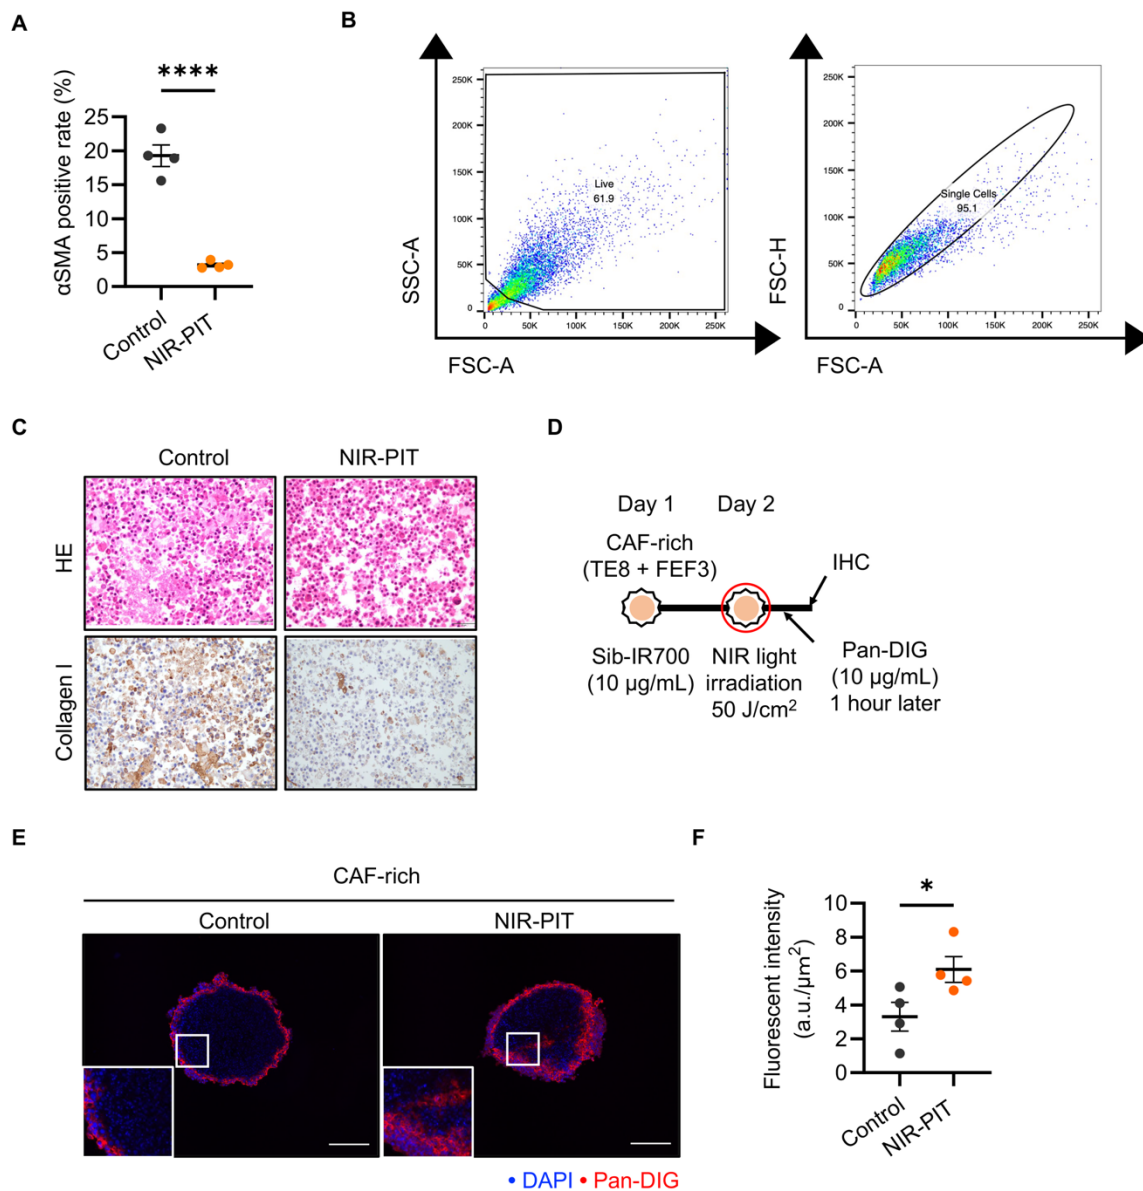

**Supplemental Figure 6. Evaluation of FAP-targeted NIR-PIT effects on CAF-rich spheroids: Cell viability,  $\alpha$ SMA reduction, and Col I reduction**

CAF-rich spheroids (human TE8 cells co-cultured with human FEF3 cells at a 1:1 ratio) were used throughout this figure.

**A.** Quantitative analysis of  $\alpha$ SMA-positive cells in CAF-rich spheroids, comparing control and NIR-PIT-treated groups 2 d post-treatment ( $n = 4$ ; mean  $\pm$  SEM; unpaired t-test). **B.** Flow cytometry analysis in CAF-rich spheroid models: Left: FSC-A and SSC-A gating, identifying 61.9% of the gated population as live cells. Right: FSC-A and FSC-H gating, identifying 95.1% of the gated population for doublet discrimination. **C.** HE and IHC staining for Col I in untreated CAF-rich control spheroids and NIR-PIT-treated CAF-rich spheroids 2 d post-treatment at 400 $\times$  magnification (scale bar: 50  $\mu$ m). **D.** Diagram of treatment schedule and NIR light irradiation for IHC in FAP-targeted NIR-PIT. **E.** Fluorescent IHC images showing Pan-DIG distribution in control and NIR-PIT-treated CAF-rich spheroids 1 h after treatment; DIG (red) and DAPI (blue), at 100 $\times$  magnification (scale bar: 200  $\mu$ m). **F.** Quantitative analysis of Pan-DIG fluorescence intensity per area ( $\mu$ m<sup>2</sup>) in control and NIR-PIT-treated CAF-rich spheroids ( $n = 4$ ; mean  $\pm$  SEM; unpaired t-test). Statistical significance: \*,  $P < .05$ ; \*\*,  $P < .01$ ; \*\*\*,  $P < .001$ ; \*\*\*\*,  $P < .0001$ ; N.S. = not significant.

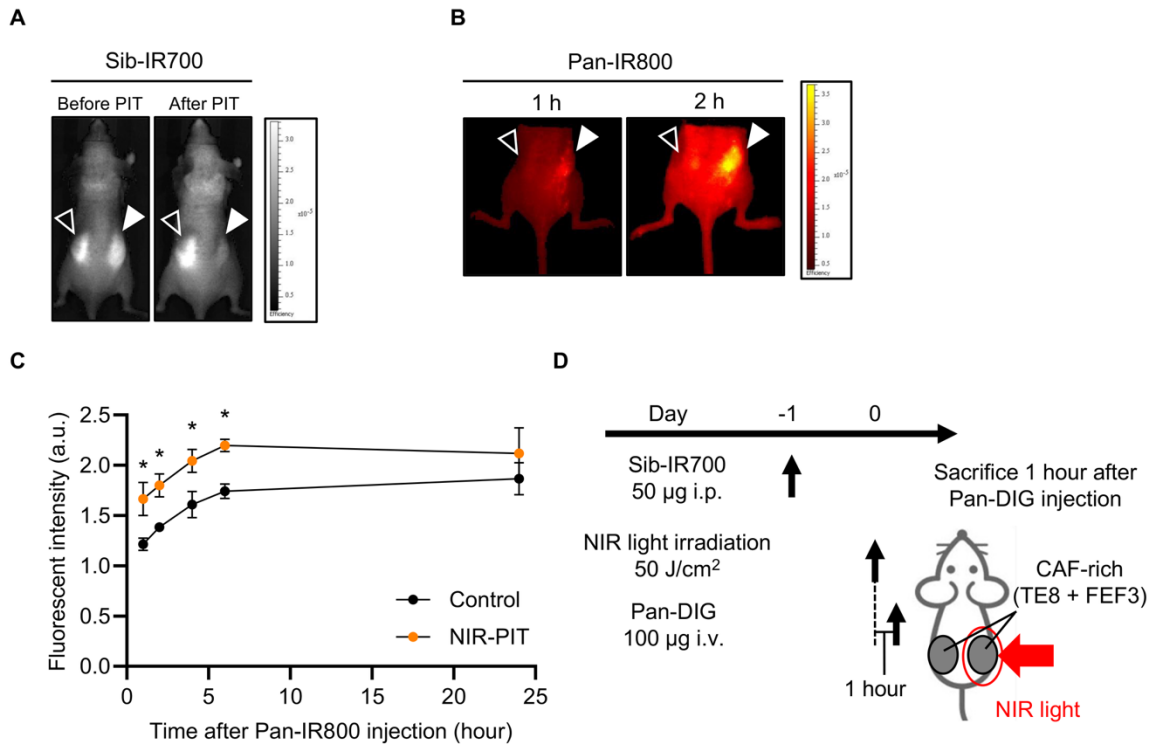

### Supplemental Figure 7. Impact of FAP-targeted NIR-PIT on drug delivery and fluorescent intensity in CAF-rich tumor models

CAF-rich tumors (human TE8 cells co-cultured with human FEF3 cells at a 1:3 ratio) were used throughout this figure.

**A.** Sib-IR700 imaging before and after FAP-targeted NIR-PIT in a bilateral CAF-rich tumor model with tumors reaching 100 mm<sup>3</sup>. Filled arrowheads indicate NIR-irradiated tumors (right), and open arrowheads indicate non-irradiated tumors (left). **B.** Pan-IR800 imaging in a bilateral CAF-rich tumor model following FAP-targeted NIR-PIT. Filled arrowheads show NIR-irradiated tumors (right), and open arrowheads show non-irradiated tumors (left). **C.** Fluorescent intensity ratio analysis (control/background vs. NIR-PIT-treated/background) over time post-Pan-IR800 administration (n = 4; mean  $\pm$  SEM; repeated measures two-way ANOVA with Tukey's test). **D.** Schematic representation of the treatment protocol and NIR light exposure. Statistical significance: \*, P < .05; \*\*, P < .01; \*\*\*, P < .001; \*\*\*\*, P < .0001; N.S. = not significant.

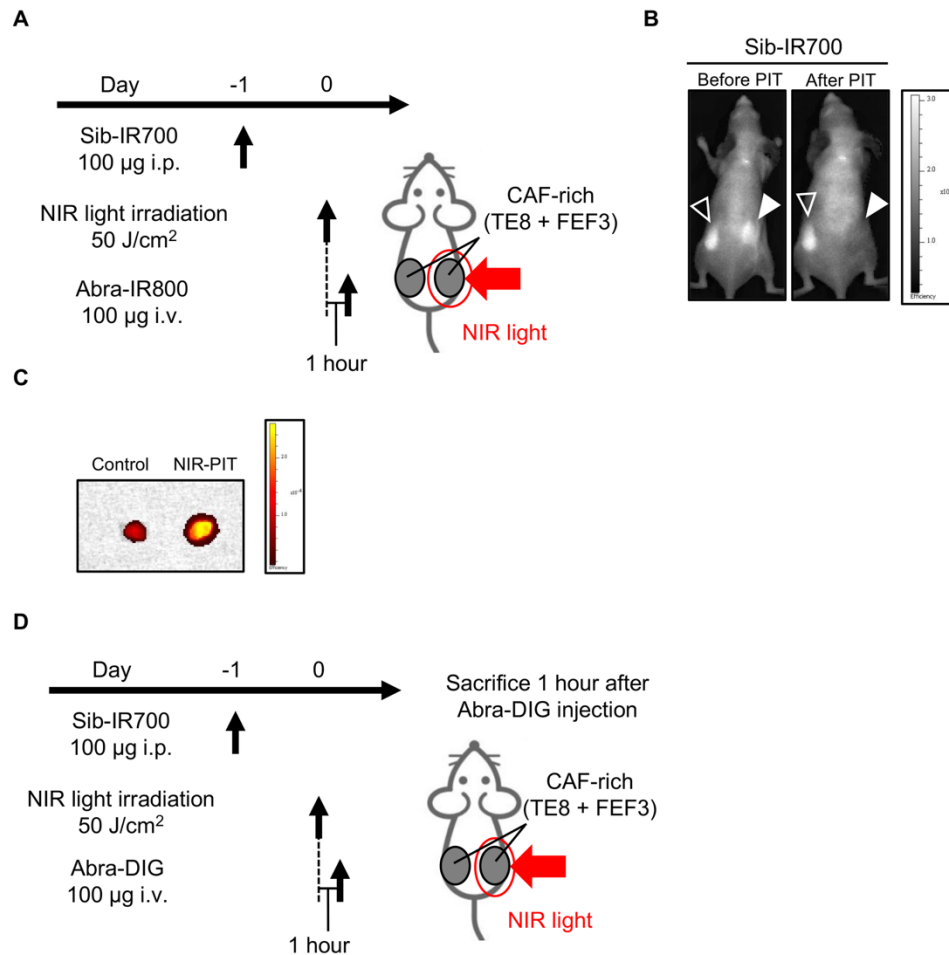

### Supplemental Figure 8. Evaluation of FAP-targeted NIR-PIT effects on Sib-IR700 and Abra-IR800 distribution in CAF-rich tumor models

CAF-rich tumors (human TE8 cells co-cultured with human FEF3 cells at a 1:3 ratio) were used throughout this figure.

**A.** Diagram illustrating the treatment protocol and NIR light application. **B.** Sib-IR700 imaging captured before and after FAP-targeted NIR-PIT in a bilateral CAF-rich tumor model with tumors reaching 100 mm<sup>3</sup>. Filled arrowheads denote NIR-irradiated tumors (right), and open arrowheads represent non-irradiated tumors (left). **C.** Abra-IR800 imaging comparing untreated control tumors (left) to NIR-PIT-treated tumors (right) 1 h post-FAP-targeted NIR-PIT. **D.** Schematic outlining the treatment regimen and NIR light exposure setup.

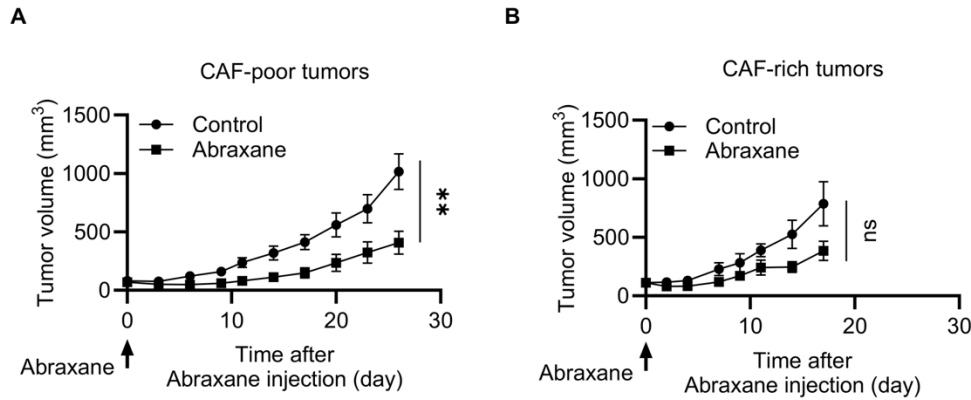

**Supplemental Figure 9. Differential effects of Abraxane on tumor growth in CAF-poor and CAF-rich tumor models**

CAF-poor tumors (human TE8 cells only) and CAF-rich tumors (human TE8 cells co-cultured with human FEF3 cells at a 1:3 ratio) were used throughout this figure.

**A.** Growth curve of bilateral CAF-poor tumors in mice, untreated (control) or treated with Abraxane (n = 4; mean ± SEM; one-way ANOVA with Tukey's test). **B.** Growth curve of bilateral CAF-rich tumors in mice, untreated (control) or treated with Abraxane (n = 3; mean ± SEM; one-way ANOVA with Tukey's test). Statistical significance: \*, P < .05; \*\*, P < .01; \*\*\*, P < .001; \*\*\*\*, P < .0001; N.S. = not significant.

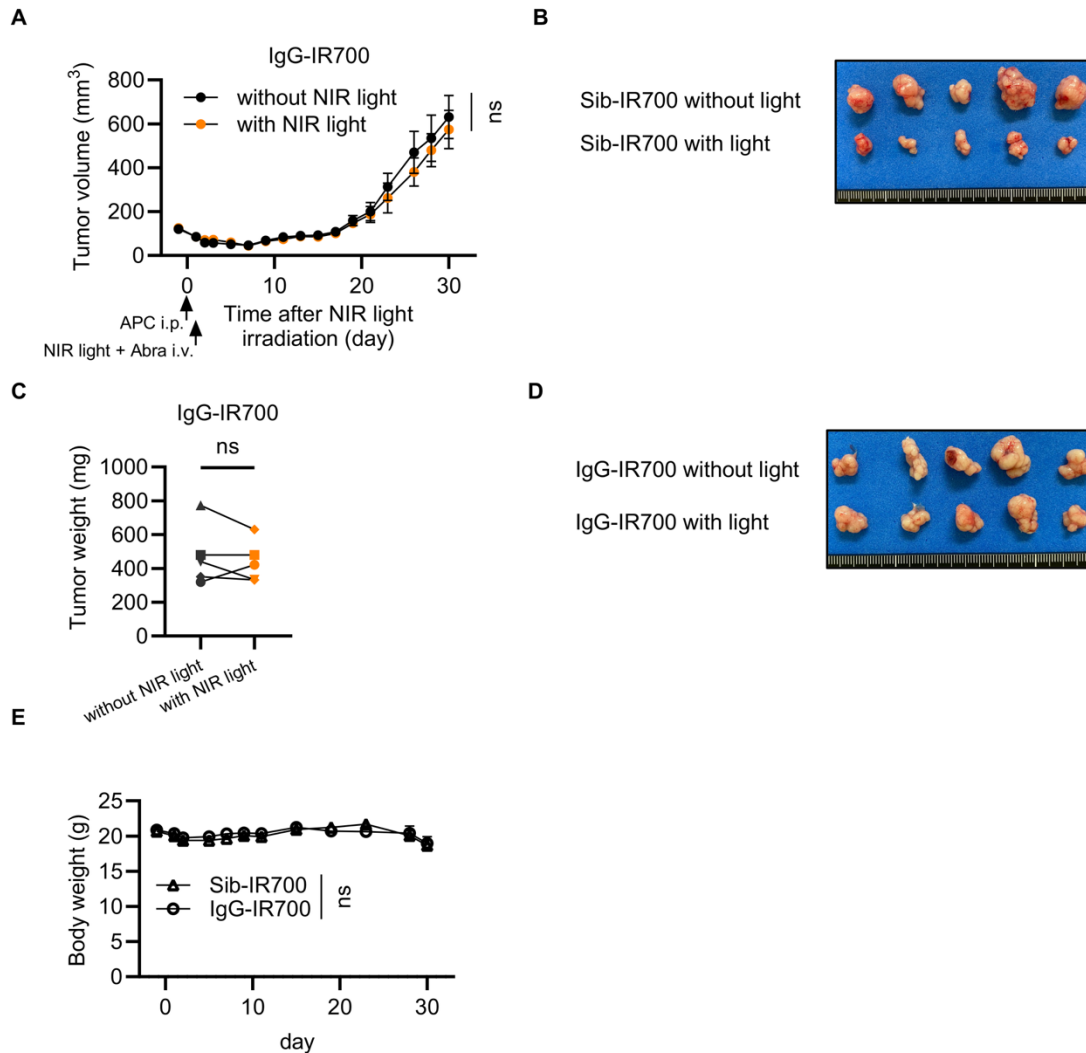

**Supplemental Figure 10. Tumor growth, weight, and body weight analysis in IgG-IR700 and Sib-IR700-treated mouse models with or without NIR light**

(CAF-rich) tumors (human TE8 cells co-cultured with human FEF3 cells at a 1:3 ratio) were used throughout this figure.

**A.** Tumor growth in mice injected with IgG-IR700, comparing groups with or without NIR light exposure ( $n = 5$ ; mean  $\pm$  SEM; one-way ANOVA with Tukey's test). **B.** Tumors excised from Sib-IR700-treated mice. The top row represents tumors without NIR light exposure, while the bottom row shows those exposed to NIR light. **C.** Tumor weight comparison between right-side

tumors exposed to NIR light and left-side tumors without light exposure in IgG-IR700-treated mice ( $n = 5$ ; ratio paired t-test). **D.** Tumors retrieved from IgG-IR700-treated mice. The top row illustrates tumors without light exposure, and the bottom row displays tumors exposed to NIR light. **E.** Body weight analysis of mice treated with Sib-IR700 and IgG-IR700. Statistical significance: \*,  $P < .05$ ; \*\*,  $P < .01$ ; \*\*\*,  $P < .001$ ; \*\*\*\*,  $P < .0001$ ; N.S. = not significant.

### **Supplemental Video Legends**

CAF-poor spheroids (human TE8 cells only) and CAF-rich spheroids (human TE8 cells co-cultured with human GFP-FEF3 cells at a 1:1 ratio) were used throughout these videos.

**Supplemental Video 1.** Original movie of spheroids showing CAF-poor spheroids labeled with DAPI (blue).

**Supplemental Video 2.** Original movie of spheroids showing CAF-rich spheroids labeled with GFP-FEF3 (green) and DAPI (blue).

**Supplemental Video 3.** Original movie of CAF-rich spheroids showing untreated (control) labeled with GFP-FEF3 (green) and DAPI (blue).

**Supplemental Video 4.** Original movie of CAF-rich spheroids showing FAP-targeted NIR-PIT-treated spheroids labeled with GFP-FEF3 (green) and DAPI (blue).

**Supplemental Table 1: Clinicopathological features for collagen I in esophageal cancer patients.**

| Variable                | Total (n=84)      | Collagen I          |                     | P value  |
|-------------------------|-------------------|---------------------|---------------------|----------|
|                         |                   | Low (n=42)          | High (n=42)         |          |
| Age (years)             |                   |                     |                     |          |
| Median (IQR)            | 68 (62-73)        | 67.00 (45.00-85.00) | 69.00 (40.00-85.00) | 0.582§   |
| Sex                     |                   |                     |                     | 1†       |
| Male                    | 67 (79.8%)        | 34 (81.0%)          | 33 (78.6%)          |          |
| Female                  | 17 (20.2%)        | 8 (19.0%)           | 9 (21.4%)           |          |
| Tumor location          |                   |                     |                     | 0.122†   |
| Cervical                | 6 (7.1%)          | 1 (2.4%)            | 5 (11.9%)           |          |
| Upper                   | 12 (14.3%)        | 9 (21.4%)           | 3 (7.1%)            |          |
| Middle                  | 39 (46.4%)        | 19 (45.2%)          | 20 (47.6%)          |          |
| Lower                   | 16 (19.1%)        | 6 (14.3%)           | 10 (23.8%)          |          |
| Abdominal               | 11 (13.1%)        | 7 (16.7%)           | 4 (9.5%)            |          |
| Pathological T stage    |                   |                     |                     | <0.001†* |
| T1                      | 38 (45.2%)        | 32 (76.2%)          | 6 (14.3%)           |          |
| T2                      | 11 (13.1%)        | 4 (9.5%)            | 7 (16.7%)           |          |
| T3                      | 32 (38.1%)        | 5 (11.9%)           | 27 (64.3%)          |          |
| T4                      | 3 (3.6%)          | 1 (2.4%)            | 2 (4.8%)            |          |
| Pathological N stage    |                   |                     |                     | 0.009†*  |
| N0                      | 40 (47.6%)        | 26 (61.9%)          | 14 (33.3%)          |          |
| N1                      | 21 (25.0%)        | 11 (26.2%)          | 10 (23.8%)          |          |
| N2                      | 15 (17.9%)        | 4 (9.5%)            | 11 (26.2%)          |          |
| N3                      | 8 (9.5%)          | 1 (2.4%)            | 7 (16.7%)           |          |
| Pathological stage      |                   |                     |                     | <0.001†* |
| I                       | 27 (32.1%)        | 21 (50.0%)          | 6 (14.3%)           |          |
| II                      | 21 (25.0%)        | 13 (31.0%)          | 8 (19.0%)           |          |
| III                     | 27 (32.1%)        | 8 (19.0%)           | 19 (45.2%)          |          |
| IV                      | 9 (10.7%)         | 0 (0.0%)            | 9 (21.4%)           |          |
| Histological type       |                   |                     |                     | 1†       |
| Squamous cell carcinoma | 75 (89.3%)        | 37 (88.1%)          | 38 (90.5%)          |          |
| Adenocarcinoma          | 7 (8.3%)          | 4 (9.5%)            | 3 (7.1%)            |          |
| Other                   | 2 (2.4%)          | 1 (2.4%)            | 1 (2.4%)            |          |
| αSMA Area Index         |                   |                     |                     | <0.001§* |
| Median (IQR)            | 8.39 (4.18-14.73) | 4.37 (3.07-7.10)    | 14.56 (10.02-18.79) |          |
| FAP Area Index          |                   |                     |                     | <0.001§* |
| Median (IQR)            | 5.86 (2.05-9.00)  | 2.82 (1.42-7.11)    | 8.10 (5.41-9.39)    |          |

§, Mann-Whitney *U* test; †, Fisher's exact test; IQR, Interquartile range

**Supplemental Table 2: Clinicopathological features for hyaluronic acid and 0–9 µm vessel in esophageal cancer patients.**

| Variable                | Hyaluronic acid     |                     | P value  | 0-9 µm vessel       |                    | P value  |
|-------------------------|---------------------|---------------------|----------|---------------------|--------------------|----------|
|                         | Low (n=42)          | High (n=42)         |          | Low (n=43)          | High (n=41)        |          |
| Age (years)             |                     |                     |          |                     |                    |          |
| Median (IQR)            | 67.50 (40.00-85.00) | 68.00 (48.00-85.00) | 0.74§    | 66.00 (40.00-85.00) | 70.00(48.00-85.00) | 0.234§   |
| Sex                     |                     |                     | 0.101†   |                     |                    | 0.28†    |
| Male                    | 30 (71.4%)          | 37 (88.1%)          |          | 32 (74.4%)          | 35 (85.4%)         |          |
| Female                  | 12 (28.6%)          | 5 (11.9%)           |          | 11 (25.6%)          | 6 (14.6%)          |          |
| Tumor location          |                     |                     | 0.371†   |                     |                    | 0.594†   |
| Cervical                | 2 ( 4.8%)           | 4 ( 9.5%)           |          | 2 ( 4.7%)           | 4 ( 9.8%)          |          |
| Upper                   | 8 (19.0%)           | 4 ( 9.5%)           |          | 8 (18.6%)           | 4 ( 9.8%)          |          |
| Middle                  | 16 (38.1%)          | 23 (54.8%)          |          | 18 (41.9%)          | 21 (51.2%)         |          |
| Lower                   | 9 (21.4%)           | 7 (16.7%)           |          | 8 (18.6%)           | 8 (19.5%)          |          |
| Abdominal               | 7 (16.7%)           | 4 ( 9.5%)           |          | 7 (16.3%)           | 4 ( 9.8%)          |          |
| Pathological T stage    |                     |                     | <0.001†* |                     |                    | <0.001†* |
| T1                      | 31 (73.8%)          | 7 (16.7%)           |          | 29 (67.4%)          | 9 (22.0%)          |          |
| T2                      | 4 ( 9.5%)           | 7 (16.7%)           |          | 5 (11.6%)           | 6 (14.6%)          |          |
| T3                      | 6 (14.3%)           | 26 (61.9%)          |          | 8 (18.6%)           | 24 (58.5%)         |          |
| T4                      | 1 ( 2.4%)           | 2 (4.8%)            |          | 1 ( 2.3%)           | 2 ( 4.9%)          |          |
| Pathological N stage    |                     |                     | 0.082†   |                     |                    | 0.106†   |
| N0                      | 24 (57.1%)          | 16 (38.1%)          |          | 26 (60.5%)          | 14 (34.1%)         |          |
| N1                      | 11 (26.2%)          | 10 (23.8%)          |          | 9 (20.9%)           | 12 (29.3%)         |          |
| N2                      | 6 (14.3%)           | 9 (21.4%)           |          | 5 (11.6%)           | 10 (24.4%)         |          |
| N3                      | 1 ( 2.4%)           | 7 (16.7%)           |          | 3 (7.0%)            | 5 (12.2%)          |          |
| Pathological stage      |                     |                     | 0.001†*  |                     |                    | 0.001†*  |
| I                       | 21 (50.0%)          | 6 (14.3%)           |          | 22 (51.2%)          | 5 (12.2%)          |          |
| II                      | 11 (26.2%)          | 10 (23.8%)          |          | 9 (20.9%)           | 12 (29.3%)         |          |
| III                     | 9 (21.4%)           | 18 (42.9%)          |          | 9 (20.9%)           | 18 (43.9%)         |          |
| IV                      | 1 ( 2.4%)           | 8 (19.0%)           |          | 3 ( 7.0%)           | 6 (14.6%)          |          |
| Histological type       |                     |                     | 1†       |                     |                    | 0.403†   |
| Squamous cell carcinoma | 37 (88.1%)          | 38 (90.5%)          |          | 39 (90.7%)          | 36 (87.8%)         |          |
| Adenocarcinoma          | 4 ( 9.5%)           | 3 ( 7.1%)           |          | 4 ( 9.3%)           | 3 ( 7.3%)          |          |
| Other                   | 1 ( 2.4%)           | 1 ( 2.4%)           |          | 0 ( 0.0%)           | 2 ( 4.9%)          |          |
| αSMA Area Index         |                     |                     | <0.001§* |                     |                    | <0.001§* |
| Median (IQR)            | 4.66 (3.21-8.03)    | 14.14 (8.68-18.16)  |          | 5.87 (3.25-8.39)    | 14.54 (9.09-18.48) |          |
| FAP Area Index          |                     |                     | <0.001§* |                     |                    | 0.006§*  |
| Median (IQR)            | 2.42 (1.42-6.06)    | 8.48 (5.41-9.63)    |          | 4.00 (1.46-8.03)    | 7.85 (5.01-9.68)   |          |

§, Mann-Whitney *U* test; †, Fisher's exact test; IQR, Interquartile range
